# Supplementary material for: Very long intergenic non-coding RNA transcripts and expression profiles are associated to specific childhood acute lymphoblastic leukemia subtypes
Source: PLoS One. 2018 Nov 15;13(11):e0207250. doi: 10.1371/journal.pone.0207250 (PMC6237371; doi:10.1371/journal.pone.0207250)
Supplement: S2 Table — (XLSX) [file pone.0207250.s007.xlsx]

## Sheet: cALL.vlincrnas.final
chr	start	end	vlincrna	strand	far_from_genes	dataset_overlap	number_overlap
chr21	30718469	31034285	chr21.30718469.31034285	+	0	GM12878,H1-Esc,HelaS3,HepG2,HUVEC,K562,NHEK,HumanBlood	8
chr2	134877485	135011829	chr2.134877485.135011829	+	0	GM12878,H1-Esc,HelaS3,HepG2,HUVEC,K562,NHEK,HumanBlood	8
chr2	139088603	139258976	chr2.139088603.139258976	-	0	GM12878,H1-Esc,HelaS3,HepG2,HUVEC,K562,NHEK,HumanBlood	8
chr2	187105253	187330974	chr2.187105253.187330974	-	1	H1-Esc,HelaS3,K562,NHEK,GM12878,HepG2,HUVEC,HumanBlood	8
chr2	24714145	24787178	chr2.24714145.24787178	+	0	HelaS3,GM12878,H1-Esc,HepG2,HUVEC,K562,NHEK,HumanBlood	8
chr4	160024283	160188997	chr4.160024283.160188997	+	0	HelaS3,HUVEC,K562,GM12878,H1-Esc,HepG2,NHEK,HumanBlood	8
chr5	115628987	115911736	chr5.115628987.115911736	+	0	GM12878,H1-Esc,HelaS3,HepG2,HUVEC,K562,NHEK,HumanBlood	8
chr6	126360458	126601498	chr6.126360458.126601498	+	0	GM12878,H1-Esc,HelaS3,HepG2,HUVEC,K562,NHEK,HumanBlood	8
chr6	158653979	158733691	chr6.158653979.158733691	+	0	GM12878,H1-Esc,HelaS3,HepG2,HUVEC,K562,NHEK,HumanBlood	8
chr6	81056056	81183945	chr6.81056056.81183945	+	0	GM12878,H1-Esc,HelaS3,HepG2,HUVEC,K562,NHEK,HumanBlood	8
chr7	128171394	128281294	chr7.128171394.128281294	+	0	H1-Esc,HelaS3,NHEK,GM12878,HepG2,HUVEC,K562,HumanBlood	8
chr9	2673564	2804154	chr9.2673564.2804154	-	0	GM12878,HepG2,K562,NHEK,H1-Esc,HelaS3,HUVEC,HumanBlood	8
chrX	57148179	57297547	chrX.57148179.57297547	+	0	NHEK,GM12878,H1-Esc,HelaS3,HepG2,HUVEC,K562,HumanBlood	8
chrX	7895638	7992368	chrX.7895638.7992368	+	0	GM12878,H1-Esc,HelaS3,HepG2,HUVEC,K562,NHEK,HumanBlood	8
chr11	28445882	28526647	chr11.28445882.28526647	+	1	H1-Esc,HelaS3,K562,GM12878,HepG2,HUVEC,HumanBlood	7
chr11	87963799	88026759	chr11.87963799.88026759	-	0	H1-Esc,HepG2,NHEK,GM12878,HUVEC,K562,HumanBlood	7
chr1	192899904	192981495	chr1.192899904.192981495	-	0	GM12878,H1-Esc,HepG2,HUVEC,K562,NHEK,HumanBlood	7
chr1	219386207	219566487	chr1.219386207.219566487	+	0	GM12878,H1-Esc,HepG2,HUVEC,K562,NHEK,HumanBlood	7
chr12	46777484	47359847	chr12.46777484.47359847	+	0	HelaS3,K562,GM12878,H1-Esc,HepG2,HUVEC,NHEK	7
chr16	85496127	85644856	chr16.85496127.85644856	+	0	GM12878,H1-Esc,HelaS3,HepG2,HUVEC,K562,HumanBlood	7
chr19	47364415	47421932	chr19.47364415.47421932	+	0	GM12878,H1-Esc,HepG2,HUVEC,K562,NHEK,HumanBlood	7
chr2	184026412	184123253	chr2.184026412.184123253	+	0	H1-Esc,NHEK,GM12878,HelaS3,HepG2,K562,HumanBlood	7
chr2	186716158	187094374	chr2.186716158.187094374	-	1	H1-Esc,K562,NHEK,GM12878,HepG2,HUVEC,HumanBlood	7
chr3	143711249	143907021	chr3.143711249.143907021	+	0	GM12878,H1-Esc,HelaS3,HepG2,HUVEC,K562,HumanBlood	7
chr3	42054610	42132745	chr3.42054610.42132745	+	0	GM12878,H1-Esc,HelaS3,HepG2,HUVEC,K562,HumanBlood	7
chr3	88134937	88238905	chr3.88134937.88238905	+	0	GM12878,H1-Esc,HelaS3,HepG2,HUVEC,K562,NHEK	7
chr4	13023331	13369346	chr4.13023331.13369346	-	0	GM12878,HelaS3,HepG2,HUVEC,K562,NHEK,HumanBlood	7
chr5	34043371	34160776	chr5.34043371.34160776	-	0	GM12878,H1-Esc,HelaS3,HepG2,HUVEC,K562,NHEK	7
chr6	138894153	139013255	chr6.138894153.139013255	-	0	HUVEC,GM12878,H1-Esc,HelaS3,HepG2,NHEK,HumanBlood	7
chr8	110176151	110253147	chr8.110176151.110253147	-	0	GM12878,NHEK,H1-Esc,HelaS3,HepG2,HUVEC,HumanBlood	7
chr8	90598563	90769798	chr8.90598563.90769798	-	0	K562,GM12878,H1-Esc,HelaS3,HepG2,HUVEC,NHEK	7
chrX	138914447	139015084	chrX.138914447.139015084	-	0	GM12878,H1-Esc,HelaS3,HepG2,HUVEC,K562,HumanBlood	7
chrX	54593720	54649477	chrX.54593720.54649477	+	0	GM12878,H1-Esc,HelaS3,HepG2,HUVEC,NHEK,HumanBlood	7
chrX	80554046	80664344	chrX.80554046.80664344	+	0	GM12878,H1-Esc,HepG2,HUVEC,K562,NHEK,HumanBlood	7
chr10	81397297	81586016	chr10.81397297.81586016	-	0	GM12878,HepG2,HUVEC,K562,H1-Esc,HelaS3	6
chr11	129062124	129149050	chr11.129062124.129149050	-	0	H1-Esc,HelaS3,HepG2,HUVEC,NHEK,HumanBlood	6
chr15	35395219	35521956	chr15.35395219.35521956	-	1	GM12878,H1-Esc,HepG2,NHEK,HUVEC,HumanBlood	6
chr15	35576348	35663163	chr15.35576348.35663163	-	0	H1-Esc,HepG2,GM12878,HUVEC,NHEK,HumanBlood	6
chr16	72206353	72698868	chr16.72206353.72698868	-	0	GM12878,H1-Esc,HelaS3,HepG2,HUVEC,K562	6
chr2	186642569	186704353	chr2.186642569.186704353	-	0	GM12878,H1-Esc,HepG2,HUVEC,K562,NHEK	6
chr2	7184309	7355377	chr2.7184309.7355377	+	0	HUVEC,K562,GM12878,H1-Esc,HepG2,HumanBlood	6
chr2	75201071	75424824	chr2.75201071.75424824	+	0	H1-Esc,GM12878,HelaS3,HUVEC,HepG2,HumanBlood	6
chr3	8812793	8918879	chr3.8812793.8918879	-	0	HelaS3,HepG2,HUVEC,K562,GM12878,HumanBlood	6
chr4	12849520	12974006	chr4.12849520.12974006	-	1	K562,GM12878,H1-Esc,HepG2,HUVEC,HumanBlood	6
chr6	126670021	126721130	chr6.126670021.126721130	+	0	HelaS3,HUVEC,GM12878,H1-Esc,HepG2,K562	6
chr6	2246041	2470423	chr6.2246041.2470423	+	0	GM12878,H1-Esc,HepG2,HUVEC,K562,HumanBlood	6
chr7	33645694	33811951	chr7.33645694.33811951	+	0	GM12878,H1-Esc,HepG2,HUVEC,NHEK,HumanBlood	6
chr7	76669267	76751671	chr7.76669267.76751671	+	0	GM12878,H1-Esc,HelaS3,HepG2,HUVEC,NHEK	6
chr9	114432526	114642190	chr9.114432526.114642190	+	0	GM12878,K562,NHEK,HepG2,HUVEC,HumanBlood	6
chr9	3526116	3696640	chr9.3526116.3696640	+	0	GM12878,H1-Esc,HepG2,HUVEC,K562,HumanBlood	6
chr9	36401416	36487501	chr9.36401416.36487501	-	0	GM12878,H1-Esc,HepG2,HUVEC,K562,HumanBlood	6
chrX	10852432	11129216	chrX.10852432.11129216	-	0	GM12878,H1-Esc,HelaS3,HepG2,HUVEC,K562	6
chrX	45603758	45708845	chrX.45603758.45708845	-	1	GM12878,H1-Esc,HepG2,HUVEC,HelaS3,HumanBlood	6
chr10	124924886	125222710	chr10.124924886.125222710	+	0	GM12878,H1-Esc,HepG2,HUVEC,HumanBlood	5
chr10	67375436	67458098	chr10.67375436.67458098	+	1	HelaS3,GM12878,H1-Esc,HepG2,HUVEC	5
chr12	19675173	19776503	chr12.19675173.19776503	+	0	GM12878,HepG2,HUVEC,NHEK,HumanBlood	5
chr13	48448829	48516790	chr13.48448829.48516790	-	0	GM12878,H1-Esc,HepG2,HUVEC,NHEK	5
chr14	97347951	97503644	chr14.97347951.97503644	+	0	HepG2,GM12878,HelaS3,K562,HumanBlood	5
chr1	86064518	86115105	chr1.86064518.86115105	-	0	GM12878,HepG2,HUVEC,K562,NHEK	5
chr2	19368330	19547475	chr2.19368330.19547475	-	0	GM12878,H1-Esc,HepG2,K562,NHEK	5
chr3	139108688	139250132	chr3.139108688.139250132	+	0	GM12878,H1-Esc,HepG2,K562,HumanBlood	5
chr4	129209580	129312956	chr4.129209580.129312956	+	0	HUVEC,GM12878,H1-Esc,K562,HumanBlood	5
chr4	15428671	15606006	chr4.15428671.15606006	-	0	HUVEC,K562,NHEK,GM12878,HepG2	5
chr4	2517586	2597827	chr4.2517586.2597827	+	0	GM12878,HepG2,HUVEC,K562,HumanBlood	5
chr5	118120643	118171748	chr5.118120643.118171748	-	0	GM12878,H1-Esc,HepG2,NHEK,HumanBlood	5
chr5	144807413	145135874	chr5.144807413.145135874	-	0	H1-Esc,K562,NHEK,HepG2,HUVEC	5
chr6	64425418	64488043	chr6.64425418.64488043	+	0	H1-Esc,GM12878,HepG2,HUVEC,NHEK	5
chr7	7918851	8007476	chr7.7918851.8007476	+	0	GM12878,HUVEC,K562,HepG2,HumanBlood	5
chr9	99637958	99708233	chr9.99637958.99708233	-	0	GM12878,HelaS3,HepG2,HUVEC,NHEK	5
chr11	107141649	107197071	chr11.107141649.107197071	-	0	GM12878,HepG2,HUVEC,NHEK	4
chr14	39820397	39877024	chr14.39820397.39877024	+	0	HelaS3,HepG2,HUVEC,NHEK	4
chr14	53790959	54059993	chr14.53790959.54059993	+	1	GM12878,H1-Esc,HUVEC,HumanBlood	4
chr14	76679146	76733361	chr14.76679146.76733361	+	0	GM12878,HepG2,K562,HumanBlood	4
chr14	86401029	86600394	chr14.86401029.86600394	+	1	HelaS3,HepG2,GM12878,HumanBlood	4
chr18	51612635	51677936	chr18.51612635.51677936	-	0	GM12878,HUVEC,NHEK,HumanBlood	4
chr21	30018096	30248385	chr21.30018096.30248385	-	0	GM12878,HepG2,K562,HumanBlood	4
chr21	33888975	33946960	chr21.33888975.33946960	-	0	H1-Esc,HepG2,HUVEC,HumanBlood	4
chr2	18825450	19030694	chr2.18825450.19030694	+	1	GM12878,HepG2,NHEK,HumanBlood	4
chr2	238007490	238094079	chr2.238007490.238094079	+	0	GM12878,H1-Esc,HepG2,HumanBlood	4
chr2	23904187	23971533	chr2.23904187.23971533	-	0	GM12878,HepG2,HUVEC,NHEK	4
chr4	128750640	128801856	chr4.128750640.128801856	-	0	GM12878,H1-Esc,HepG2,K562	4
chr4	174291273	174406640	chr4.174291273.174406640	+	0	GM12878,HepG2,HUVEC,HumanBlood	4
chr5	90765765	90850181	chr5.90765765.90850181	+	1	GM12878,HelaS3,HUVEC,HumanBlood	4
chr6	141125478	141219540	chr6.141125478.141219540	-	1	GM12878,HelaS3,HepG2,K562	4
chr6	143858322	143929316	chr6.143858322.143929316	+	0	HepG2,GM12878,H1-Esc,HUVEC	4
chr7	141450288	141607587	chr7.141450288.141607587	+	0	GM12878,HepG2,K562,NHEK	4
chr7	65887106	65958528	chr7.65887106.65958528	-	1	GM12878,HepG2,K562,HumanBlood	4
chr8	142264728	142317091	chr8.142264728.142317091	-	0	GM12878,H1-Esc,HUVEC,K562	4
chr8	75279392	75372262	chr8.75279392.75372262	+	0	HepG2,GM12878,H1-Esc,NHEK	4
chrX	14646391	14710486	chrX.14646391.14710486	-	0	GM12878,H1-Esc,HepG2,K562	4
chrX	55934682	56257762	chrX.55934682.56257762	+	0	GM12878,H1-Esc,HUVEC,NHEK	4
chrX	64254853	64596654	chrX.64254853.64596654	+	0	H1-Esc,HepG2,K562,HumanBlood	4
chr11	112104695	112255421	chr11.112104695.112255421	+	0	GM12878,HepG2,HumanBlood	3
chr11	123230023	123396343	chr11.123230023.123396343	+	0	GM12878,HelaS3,HumanBlood	3
chr11	22942077	23238423	chr11.22942077.23238423	+	1	GM12878,HepG2,HUVEC	3
chr1	187044319	187311173	chr1.187044319.187311173	+	1	GM12878,K562,HumanBlood	3
chr1	232651354	232765656	chr1.232651354.232765656	-	0	H1-Esc,HUVEC,HumanBlood	3
chr12	47983670	48055714	chr12.47983670.48055714	-	0	HUVEC,K562,HumanBlood	3
chr12	67197917	67462925	chr12.67197917.67462925	-	0	H1-Esc,NHEK,HumanBlood	3
chr12	9163403	9415235	chr12.9163403.9415235	+	0	H1-Esc,HelaS3,HUVEC	3
chr13	109819076	109912607	chr13.109819076.109912607	-	0	HelaS3,NHEK,HumanBlood	3
chr15	100347841	100443865	chr15.100347841.100443865	+	0	GM12878,HUVEC,HumanBlood	3
chr15	39432697	39719897	chr15.39432697.39719897	-	0	HepG2,HUVEC,NHEK	3
chr16	20685779	20766934	chr16.20685779.20766934	+	0	HepG2,HUVEC,K562	3
chr1	72806805	72972957	chr1.72806805.72972957	+	1	H1-Esc,HelaS3,HUVEC	3
chr17	45407321	45569832	chr17.45407321.45569832	-	0	HelaS3,HepG2,K562	3
chr1	89893264	89990841	chr1.89893264.89990841	-	0	H1-Esc,HepG2,K562	3
chr2	166676935	166729853	chr2.166676935.166729853	-	0	HepG2,HUVEC,HumanBlood	3
chr2	173308321	173421088	chr2.173308321.173421088	-	0	GM12878,HUVEC,K562	3
chr2	190994487	191069359	chr2.190994487.191069359	-	0	GM12878,HUVEC,NHEK	3
chr2	19134039	19186545	chr2.19134039.19186545	+	1	NHEK,HepG2,HumanBlood	3
chr2	213634463	213864410	chr2.213634463.213864410	-	0	GM12878,NHEK,HumanBlood	3
chr2	215675031	215876731	chr2.215675031.215876731	+	0	HepG2,GM12878,HelaS3	3
chr2	32039225	32092878	chr2.32039225.32092878	-	0	GM12878,HUVEC,NHEK	3
chr2	64882266	64994952	chr2.64882266.64994952	-	0	GM12878,HepG2,HumanBlood	3
chr2	65172430	65313987	chr2.65172430.65313987	-	0	H1-Esc,HepG2,K562	3
chr3	138479112	138553555	chr3.138479112.138553555	-	0	HepG2,K562,HumanBlood	3
chr3	158547508	158601202	chr3.158547508.158601202	+	0	GM12878,HepG2,HumanBlood	3
chr3	3616433	3869184	chr3.3616433.3869184	-	0	HepG2,HUVEC,HumanBlood	3
chr4	26757835	26840508	chr4.26757835.26840508	+	0	HUVEC,NHEK,HumanBlood	3
chr5	171236660	171288555	chr5.171236660.171288555	-	0	HepG2,NHEK,HumanBlood	3
chr5	18674917	18746287	chr5.18674917.18746287	-	1	GM12878,K562,HumanBlood	3
chr5	5368456	5422120	chr5.5368456.5422120	-	0	GM12878,HepG2,HumanBlood	3
chr5	81839331	82122532	chr5.81839331.82122532	+	1	H1-Esc,HepG2,K562	3
chr5	96395918	96629600	chr5.96395918.96629600	+	0	HUVEC,HepG2,K562	3
chr6	167276039	167343003	chr6.167276039.167343003	-	0	GM12878,HepG2,K562	3
chr6	82398297	82455401	chr6.82398297.82455401	-	0	GM12878,HepG2,HumanBlood	3
chr7	149774758	149944300	chr7.149774758.149944300	-	0	K562,HelaS3,HepG2	3
chr7	22611408	22672510	chr7.22611408.22672510	-	1	HUVEC,K562,HumanBlood	3
chr7	30407308	30478149	chr7.30407308.30478149	+	0	GM12878,HelaS3,HepG2	3
chr8	2584506	2866338	chr8.2584506.2866338	+	0	GM12878,K562,HumanBlood	3
chr8	90240017	90376636	chr8.90240017.90376636	-	1	NHEK,H1-Esc,HelaS3	3
chr9	77762114	77831391	chr9.77762114.77831391	+	0	HUVEC,NHEK,HumanBlood	3
chrX	124217791	124323319	chrX.124217791.124323319	-	1	H1-Esc,K562,HumanBlood	3
chrX	135882006	135951352	chrX.135882006.135951352	-	0	HepG2,K562,HumanBlood	3
chrY	15818002	16031713	chrY.15818002.16031713	+	0	H1-Esc,HUVEC,HumanBlood	3
chr10	96830601	96907059	chr10.96830601.96907059	-	0	H1-Esc,NHEK	2
chr10	96919934	96997321	chr10.96919934.96997321	-	0	H1-Esc,NHEK	2
chr1	116921115	117057155	chr1.116921115.117057155	-	0	GM12878,HumanBlood	2
chr11	22835860	22919005	chr11.22835860.22919005	+	0	HepG2,GM12878	2
chr1	188066266	188359062	chr1.188066266.188359062	+	1	HUVEC,K562	2
chr12	102317401	102377194	chr12.102317401.102377194	+	0	GM12878,HumanBlood	2
chr1	210849638	210901398	chr1.210849638.210901398	+	0	GM12878,HepG2	2
chr1	221232583	221283109	chr1.221232583.221283109	+	1	GM12878,HumanBlood	2
chr12	68774272	68845434	chr12.68774272.68845434	-	1	GM12878,HumanBlood	2
chr12	9453575	9549212	chr12.9453575.9549212	+	0	GM12878,H1-Esc	2
chr12	95123146	95211907	chr12.95123146.95211907	-	1	GM12878,HumanBlood	2
chr13	20204645	20277008	chr13.20204645.20277008	-	0	HepG2,HUVEC	2
chr13	51331903	51483603	chr13.51331903.51483603	+	0	K562,HumanBlood	2
chr1	35259854	35315962	chr1.35259854.35315962	-	0	HUVEC,HumanBlood	2
chr13	64518317	64590691	chr13.64518317.64590691	-	1	HelaS3,K562	2
chr14	35375671	35451718	chr14.35375671.35451718	-	0	HepG2,HumanBlood	2
chr14	53684549	53780893	chr14.53684549.53780893	+	1	H1-Esc,HumanBlood	2
chr14	56768031	56866813	chr14.56768031.56866813	+	0	HUVEC,HumanBlood	2
chr14	95942173	96000796	chr14.95942173.96000796	-	0	HepG2,HumanBlood	2
chr15	34722740	34805874	chr15.34722740.34805874	-	1	HepG2,K562	2
chr15	81154511	81268085	chr15.81154511.81268085	-	0	H1-Esc,HepG2	2
chr15	81707269	81848749	chr15.81707269.81848749	+	1	H1-Esc,HepG2	2
chr15	82032892	82085174	chr15.82032892.82085174	-	1	H1-Esc,K562	2
chr15	82099193	82154978	chr15.82099193.82154978	-	1	H1-Esc,K562	2
chr16	29086402	29284226	chr16.29086402.29284226	+	0	GM12878,HUVEC	2
chr1	65433670	65533377	chr1.65433670.65533377	-	0	HUVEC,HumanBlood	2
chr16	63440067	63566328	chr16.63440067.63566328	-	1	HUVEC,NHEK	2
chr17	13833575	13972644	chr17.13833575.13972644	-	0	HepG2,HumanBlood	2
chr18	1159206	1218922	chr18.1159206.1218922	+	1	K562,H1-Esc	2
chr1	83506399	83644379	chr1.83506399.83644379	-	1	H1-Esc,HumanBlood	2
chr18	68266926	68399811	chr18.68266926.68399811	+	0	GM12878,HumanBlood	2
chr19	19887494	19952837	chr19.19887494.19952837	+	0	GM12878,HepG2	2
chr1	93678626	93811455	chr1.93678626.93811455	-	0	GM12878,HepG2	2
chr21	16185673	16333555	chr21.16185673.16333555	-	0	HepG2,HUVEC	2
chr22	27114949	27329609	chr22.27114949.27329609	+	0	GM12878,HumanBlood	2
chr22	35820495	35881439	chr22.35820495.35881439	+	0	HelaS3,HumanBlood	2
chr2	57629598	58273880	chr2.57629598.58273880	-	0	GM12878,HumanBlood	2
chr2	57842428	57994313	chr2.57842428.57994313	+	1	GM12878,HumanBlood	2
chr2	75478374	75644141	chr2.75478374.75644141	-	1	GM12878,HumanBlood	2
chr2	8452883	8532120	chr2.8452883.8532120	-	1	GM12878,HumanBlood	2
chr3	107811011	107903130	chr3.107811011.107903130	+	0	GM12878,HumanBlood	2
chr3	13142315	13203188	chr3.13142315.13203188	-	1	K562,HepG2	2
chr3	13270885	13321608	chr3.13270885.13321608	-	1	K562,HepG2	2
chr3	151862609	151923190	chr3.151862609.151923190	-	1	K562,HumanBlood	2
chr3	155122788	155197670	chr3.155122788.155197670	-	0	H1-Esc,HepG2	2
chr3	156871333	157057456	chr3.156871333.157057456	+	0	GM12878,HumanBlood	2
chr3	178660512	178734986	chr3.178660512.178734986	-	0	GM12878,NHEK	2
chr3	18486732	18637371	chr3.18486732.18637371	+	0	H1-Esc,HumanBlood	2
chr3	30962880	31330384	chr3.30962880.31330384	-	1	GM12878,HepG2	2
chr3	34227169	34758914	chr3.34227169.34758914	+	1	GM12878,HUVEC	2
chr3	3550481	3603336	chr3.3550481.3603336	-	1	HepG2,HumanBlood	2
chr4	11069061	11294205	chr4.11069061.11294205	+	1	GM12878,H1-Esc	2
chr4	11330206	11557196	chr4.11330206.11557196	+	0	GM12878,HumanBlood	2
chr4	15290821	15418238	chr4.15290821.15418238	-	0	HepG2,HumanBlood	2
chr4	190203741	190284761	chr4.190203741.190284761	-	1	HUVEC,HepG2	2
chr4	74125060	74184633	chr4.74125060.74184633	+	0	H1-Esc,HepG2	2
chr4	78091519	78431547	chr4.78091519.78431547	+	0	GM12878,HumanBlood	2
chr4	9535465	9615234	chr4.9535465.9615234	+	1	GM12878,H1-Esc	2
chr5	100237220	100292231	chr5.100237220.100292231	+	0	GM12878,HumanBlood	2
chr5	137107165	137175767	chr5.137107165.137175767	-	0	GM12878,K562	2
chr5	175279136	175386419	chr5.175279136.175386419	-	0	GM12878,H1-Esc	2
chr5	49558960	49692030	chr5.49558960.49692030	-	0	GM12878,HumanBlood	2
chr5	85962032	86019746	chr5.85962032.86019746	+	1	GM12878,H1-Esc	2
chr5	86032133	86231210	chr5.86032133.86231210	+	1	GM12878,H1-Esc	2
chr5	88177645	88568729	chr5.88177645.88568729	+	0	GM12878,K562	2
chr6	104908655	105102853	chr6.104908655.105102853	-	1	HelaS3,GM12878	2
chr6	119671403	120226366	chr6.119671403.120226366	+	0	GM12878,HumanBlood	2
chr6	14137148	14355631	chr6.14137148.14355631	+	0	GM12878,HumanBlood	2
chr6	14422404	14478065	chr6.14422404.14478065	-	1	H1-Esc,HumanBlood	2
chr6	14511555	14599912	chr6.14511555.14599912	-	1	H1-Esc,HumanBlood	2
chr6	53589479	53659246	chr6.53589479.53659246	-	0	HepG2,NHEK	2
chr6	86388747	86538210	chr6.86388747.86538210	+	1	H1-Esc,HepG2	2
chr7	36765926	36892510	chr7.36765926.36892510	-	0	GM12878,HumanBlood	2
chr7	65825732	65903492	chr7.65825732.65903492	+	0	HepG2,HumanBlood	2
chr7	66310031	66379670	chr7.66310031.66379670	+	0	HepG2,HumanBlood	2
chr7	76178656	76343688	chr7.76178656.76343688	+	0	HepG2,HUVEC	2
chr8	10286401	10363872	chr8.10286401.10363872	+	0	HUVEC,HumanBlood	2
chr8	103876310	104032552	chr8.103876310.104032552	+	0	GM12878,HumanBlood	2
chr8	2489570	2590644	chr8.2489570.2590644	-	1	GM12878,K562	2
chr8	61822696	61956997	chr8.61822696.61956997	+	0	GM12878,HumanBlood	2
chr8	66622825	66672868	chr8.66622825.66672868	+	0	HepG2,HUVEC	2
chr9	111272699	111605381	chr9.111272699.111605381	-	1	HepG2,HUVEC	2
chr9	5838183	5919007	chr9.5838183.5919007	-	0	GM12878,HumanBlood	2
chr9	91839534	91902364	chr9.91839534.91902364	-	1	H1-Esc,HumanBlood	2
chr9	93832009	93933004	chr9.93832009.93933004	-	1	HepG2,HumanBlood	2
chrX	19003781	19057385	chrX.19003781.19057385	+	0	HepG2,HUVEC	2
chrX	64618478	64671789	chrX.64618478.64671789	+	1	H1-Esc,HepG2	2
chrX	6676695	6966959	chrX.6676695.6966959	-	0	GM12878,H1-Esc	2
chrX	78400193	78714861	chrX.78400193.78714861	+	0	GM12878,HumanBlood	2
chrY	22559486	22737349	chrY.22559486.22737349	-	0	HepG2,HumanBlood	2
chrY	2870990	3009196	chrY.2870990.3009196	+	1	HUVEC,HumanBlood	2
chr10	47530006	47640770	chr10.47530006.47640770	-	1	HumanBlood	1
chr10	54205582	54515221	chr10.54205582.54515221	-	0	HepG2	1
chr10	91647269	92097103	chr10.91647269.92097103	+	1	GM12878	1
chr1	108506772	108648137	chr1.108506772.108648137	+	0	HumanBlood	1
chr11	111955898	112046206	chr11.111955898.112046206	+	0	HUVEC	1
chr11	125664763	125724588	chr11.125664763.125724588	-	0	HUVEC	1
chr11	14893604	14980210	chr11.14893604.14980210	+	0	HumanBlood	1
chr11	23250246	23341934	chr11.23250246.23341934	+	1	GM12878	1
chr11	6541920	6642143	chr11.6541920.6642143	-	0	HUVEC	1
chr1	167528224	167601690	chr1.167528224.167601690	-	0	HumanBlood	1
chr11	74553458	74632833	chr11.74553458.74632833	+	0	HelaS3	1
chr11	7727941	7901572	chr11.7727941.7901572	-	0	NHEK	1
chr1	177514504	177566803	chr1.177514504.177566803	-	1	GM12878	1
chr1	185260914	185320566	chr1.185260914.185320566	+	0	HepG2	1
chr1	186390578	186458059	chr1.186390578.186458059	+	0	GM12878	1
chr11	91958065	92019960	chr11.91958065.92019960	+	1	H1-Esc	1
chr11	94591827	94658315	chr11.94591827.94658315	-	0	HumanBlood	1
chr1	194613427	194704894	chr1.194613427.194704894	-	1	K562	1
chr1	201476465	201617124	chr1.201476465.201617124	+	0	HUVEC	1
chr12	102123424	102189782	chr12.102123424.102189782	+	0	HepG2	1
chr12	11328652	11737320	chr12.11328652.11737320	+	0	HUVEC	1
chr12	127152328	127210040	chr12.127152328.127210040	-	1	HumanBlood	1
chr12	14887290	14939411	chr12.14887290.14939411	-	0	HumanBlood	1
chr12	22843608	22990724	chr12.22843608.22990724	+	0	H1-Esc	1
chr12	31925186	32049484	chr12.31925186.32049484	-	0	HumanBlood	1
chr1	238247932	238344160	chr1.238247932.238344160	+	1	GM12878	1
chr12	3863928	3918026	chr12.3863928.3918026	-	0	HumanBlood	1
chr12	49523298	49585085	chr12.49523298.49585085	+	0	HumanBlood	1
chr12	68383274	68594639	chr12.68383274.68594639	+	0	HumanBlood	1
chr12	89730227	89813475	chr12.89730227.89813475	-	0	HumanBlood	1
chr12	89918832	89972115	chr12.89918832.89972115	+	0	HumanBlood	1
chr13	109965162	110384502	chr13.109965162.110384502	-	1	HumanBlood	1
chr13	81260680	81311416	chr13.81260680.81311416	+	1	GM12878	1
chr13	84661090	84726821	chr13.84661090.84726821	+	1	HumanBlood	1
chr13	84816196	84917983	chr13.84816196.84917983	+	1	HumanBlood	1
chr1	41708316	41759265	chr1.41708316.41759265	+	0	HepG2	1
chr14	38742493	38841014	chr14.38742493.38841014	+	1	HUVEC	1
chr14	59874940	59939360	chr14.59874940.59939360	-	0	HelaS3	1
chr14	65745958	65847461	chr14.65745958.65847461	+	1	HumanBlood	1
chr14	71787303	71933901	chr14.71787303.71933901	+	0	HumanBlood	1
chr14	80892110	80942998	chr14.80892110.80942998	-	0	H1-Esc	1
chr14	81512408	81631624	chr14.81512408.81631624	-	0	HepG2	1
chr14	98499667	98671396	chr14.98499667.98671396	-	1	HumanBlood	1
chr15	25684060	25805826	chr15.25684060.25805826	+	0	HumanBlood	1
chr15	70777384	70828060	chr15.70777384.70828060	-	1	HumanBlood	1
chr15	74753673	74833184	chr15.74753673.74833184	+	0	HumanBlood	1
chr15	98135071	98285016	chr15.98135071.98285016	-	0	K562	1
chr1	61061375	61235866	chr1.61061375.61235866	-	1	K562	1
chr16	25269803	25332720	chr16.25269803.25332720	+	0	HumanBlood	1
chr1	63154068	63216479	chr1.63154068.63216479	+	0	HepG2	1
chr16	63188503	63339061	chr16.63188503.63339061	-	1	NHEK	1
chr16	73817935	74136619	chr16.73817935.74136619	-	1	GM12878	1
chr16	74303193	74366303	chr16.74303193.74366303	-	0	HepG2	1
chr1	72698446	72777872	chr1.72698446.72777872	+	0	HUVEC	1
chr17	30707995	30765064	chr17.30707995.30765064	+	0	HumanBlood	1
chr17	37690818	37751226	chr17.37690818.37751226	+	0	HumanBlood	1
chr17	41388129	41464477	chr17.41388129.41464477	-	1	HepG2	1
chr17	66097775	66254957	chr17.66097775.66254957	+	0	HumanBlood	1
chr17	6777982	6904231	chr17.6777982.6904231	-	0	K562	1
chr18	12720645	12776106	chr18.12720645.12776106	-	0	HumanBlood	1
chr18	20452341	20513646	chr18.20452341.20513646	-	0	HelaS3	1
chr1	90185094	90255711	chr1.90185094.90255711	+	0	HUVEC	1
chr20	1004793	1099049	chr20.1004793.1099049	-	0	HumanBlood	1
chr20	19740778	19830369	chr20.19740778.19830369	+	1	HUVEC	1
chr20	50649525	50700549	chr20.50649525.50700549	-	0	HUVEC	1
chr20	5178533	5229252	chr20.5178533.5229252	+	0	HepG2	1
chr20	57696304	57766074	chr20.57696304.57766074	+	0	HumanBlood	1
chr2	113528423	113597617	chr2.113528423.113597617	+	0	HepG2	1
chr2	11606456	11673262	chr2.11606456.11673262	+	0	H1-Esc	1
chr21	16701060	16915912	chr21.16701060.16915912	-	1	HepG2	1
chr2	122889298	123099920	chr2.122889298.123099920	+	1	HUVEC	1
chr2	128182349	128238382	chr2.128182349.128238382	-	0	HumanBlood	1
chr2	158184225	158271130	chr2.158184225.158271130	-	0	GM12878	1
chr2	165947463	166095894	chr2.165947463.166095894	+	0	HepG2	1
chr2	191299983	191371618	chr2.191299983.191371618	-	0	HelaS3	1
chr2	191367050	191480846	chr2.191367050.191480846	+	0	HumanBlood	1
chr2	196135140	196300179	chr2.196135140.196300179	-	1	HumanBlood	1
chr2	203634545	203696509	chr2.203634545.203696509	+	0	HepG2	1
chr2	215430435	215548456	chr2.215430435.215548456	-	0	HumanBlood	1
chr22	29185350	29270934	chr22.29185350.29270934	+	0	HumanBlood	1
chr2	242823550	242980474	chr2.242823550.242980474	+	0	GM12878	1
chr2	32531658	32581753	chr2.32531658.32581753	+	0	HumanBlood	1
chr2	42984206	43042436	chr2.42984206.43042436	+	0	HumanBlood	1
chr2	43255096	43457352	chr2.43255096.43457352	-	0	HumanBlood	1
chr2	46857315	46909453	chr2.46857315.46909453	+	0	HumanBlood	1
chr2	57519490	57619091	chr2.57519490.57619091	-	1	GM12878	1
chr2	60396212	60640407	chr2.60396212.60640407	-	1	HumanBlood	1
chr2	62498370	62586427	chr2.62498370.62586427	+	1	K562	1
chr2	63995967	64068752	chr2.63995967.64068752	-	0	H1-Esc	1
chr3	112127995	112264659	chr3.112127995.112264659	+	0	H1-Esc	1
chr3	112752372	112863258	chr3.112752372.112863258	+	1	HumanBlood	1
chr3	116306910	116519337	chr3.116306910.116519337	-	1	GM12878	1
chr3	116626552	116725294	chr3.116626552.116725294	-	1	GM12878	1
chr3	117114632	117447997	chr3.117114632.117447997	-	1	H1-Esc	1
chr3	117527024	117716352	chr3.117527024.117716352	-	1	H1-Esc	1
chr3	125581804	125633648	chr3.125581804.125633648	-	1	NHEK	1
chr3	142838277	143156687	chr3.142838277.143156687	+	0	HumanBlood	1
chr3	151176497	151257053	chr3.151176497.151257053	-	0	K562	1
chr3	158410360	158510512	chr3.158410360.158510512	+	0	HepG2	1
chr3	176331962	176543373	chr3.176331962.176543373	-	1	H1-Esc	1
chr3	179674541	179748551	chr3.179674541.179748551	+	0	GM12878	1
chr3	21584405	21725328	chr3.21584405.21725328	+	0	K562	1
chr3	71635043	71728439	chr3.71635043.71728439	-	0	HumanBlood	1
chr3	87859563	87927994	chr3.87859563.87927994	+	1	K562	1
chr3	87939049	88031625	chr3.87939049.88031625	+	0	K562	1
chr4	109088812	109260569	chr4.109088812.109260569	+	0	HumanBlood	1
chr4	132816874	132895301	chr4.132816874.132895301	-	1	HUVEC	1
chr4	149363975	149418535	chr4.149363975.149418535	+	0	HumanBlood	1
chr4	169085181	169137438	chr4.169085181.169137438	-	0	HUVEC	1
chr4	35903563	36067619	chr4.35903563.36067619	-	0	HumanBlood	1
chr4	56741826	56814669	chr4.56741826.56814669	-	0	HUVEC	1
chr4	84059223	84184976	chr4.84059223.84184976	-	0	HumanBlood	1
chr5	108614097	108670409	chr5.108614097.108670409	-	0	HumanBlood	1
chr5	126172773	126346369	chr5.126172773.126346369	+	0	H1-Esc	1
chr5	130541119	130599015	chr5.130541119.130599015	+	0	HumanBlood	1
chr5	130703278	130759613	chr5.130703278.130759613	-	0	HepG2	1
chr5	132949519	133187102	chr5.132949519.133187102	-	0	GM12878	1
chr5	140628951	140698056	chr5.140628951.140698056	-	0	HumanBlood	1
chr5	148208197	148267360	chr5.148208197.148267360	+	0	NHEK	1
chr5	157739029	157816986	chr5.157739029.157816986	-	1	GM12878	1
chr5	159895040	160005121	chr5.159895040.160005121	+	0	GM12878	1
chr5	28812165	28885026	chr5.28812165.28885026	+	1	K562	1
chr5	36660351	36725279	chr5.36660351.36725279	-	0	GM12878	1
chr5	42918996	43067445	chr5.42918996.43067445	-	0	HumanBlood	1
chr5	49845542	49963565	chr5.49845542.49963565	-	0	HumanBlood	1
chr5	81614527	81725039	chr5.81614527.81725039	+	0	GM12878	1
chr5	86241316	86314486	chr5.86241316.86314486	+	1	GM12878	1
chr5	97707946	97768787	chr5.97707946.97768787	-	1	H1-Esc	1
chr5	97779354	97929268	chr5.97779354.97929268	-	1	H1-Esc	1
chr6	106059717	106113246	chr6.106059717.106113246	-	1	HumanBlood	1
chr6	111590261	111710328	chr6.111590261.111710328	+	0	NHEK	1
chr6	127943686	128029338	chr6.127943686.128029338	-	0	HumanBlood	1
chr6	132270923	132537823	chr6.132270923.132537823	+	0	H1-Esc	1
chr6	140880039	140945088	chr6.140880039.140945088	-	1	HepG2	1
chr6	156117174	156615623	chr6.156117174.156615623	-	1	HumanBlood	1
chr6	156590681	156644757	chr6.156590681.156644757	+	1	HumanBlood	1
chr6	160022197	160100148	chr6.160022197.160100148	-	0	HumanBlood	1
chr6	27854850	27927289	chr6.27854850.27927289	+	0	HepG2	1
chr6	2785979	2862227	chr6.2785979.2862227	+	0	HUVEC	1
chr6	32233707	32376054	chr6.32233707.32376054	+	0	H1-Esc	1
chr6	3963027	4021118	chr6.3963027.4021118	-	0	HumanBlood	1
chr6	53051370	53132195	chr6.53051370.53132195	-	0	HumanBlood	1
chr6	5843727	5963585	chr6.5843727.5963585	+	1	H1-Esc	1
chr6	68750380	68821781	chr6.68750380.68821781	+	1	K562	1
chr6	99872824	99960999	chr6.99872824.99960999	+	0	HepG2	1
chr7	102397528	102452649	chr7.102397528.102452649	-	0	HUVEC	1
chr7	102451231	102501525	chr7.102451231.102501525	+	0	HepG2	1
chr7	133750513	133811719	chr7.133750513.133811719	+	0	HumanBlood	1
chr7	30202402	30273546	chr7.30202402.30273546	+	0	HumanBlood	1
chr7	92460364	92682737	chr7.92460364.92682737	+	0	HepG2	1
chr7	94186328	94246576	chr7.94186328.94246576	+	0	GM12878	1
chr8	16050301	16314548	chr8.16050301.16314548	-	0	HUVEC	1
chr8	24182083	24244968	chr8.24182083.24244968	-	0	GM12878	1
chr8	90825953	90945563	chr8.90825953.90945563	-	0	HumanBlood	1
chr8	95892721	95970235	chr8.95892721.95970235	+	0	HelaS3	1
chr8	98155975	98206660	chr8.98155975.98206660	+	0	HUVEC	1
chr9	110752918	110815568	chr9.110752918.110815568	-	1	HumanBlood	1
chr9	110841429	111082787	chr9.110841429.111082787	-	1	NHEK	1
chr9	125529152	125580285	chr9.125529152.125580285	-	0	HUVEC	1
chr9	34993044	35056038	chr9.34993044.35056038	-	0	HUVEC	1
chr9	76846821	76923512	chr9.76846821.76923512	-	1	H1-Esc	1
chr9	82439359	83138542	chr9.82439359.83138542	+	1	HumanBlood	1
chr9	83279409	83486946	chr9.83279409.83486946	+	1	HumanBlood	1
chr9	86154124	86219291	chr9.86154124.86219291	-	0	HumanBlood	1
chrX	154278405	154376154	chrX.154278405.154376154	-	0	HepG2	1
chrX	38730323	38880420	chrX.38730323.38880420	+	1	GM12878	1
chrX	39030061	39128920	chrX.39030061.39128920	-	1	HumanBlood	1
chrX	51057660	51139359	chrX.51057660.51139359	-	0	HumanBlood	1
chrX	62593144	62780883	chrX.62593144.62780883	-	1	HUVEC	1
chrX	70318658	70418017	chrX.70318658.70418017	-	0	GM12878	1
chr10	108026827	108310860	chr10.108026827.108310860	-	1	0	0
chr10	114578504	114654928	chr10.114578504.114654928	+	0	0	0
chr10	115001630	115243532	chr10.115001630.115243532	+	1	0	0
chr10	116529669	116581337	chr10.116529669.116581337	-	0	0	0
chr10	11673194	11727489	chr10.11673194.11727489	-	1	0	0
chr10	122554706	122610613	chr10.122554706.122610613	-	0	0	0
chr10	129979327	130122166	chr10.129979327.130122166	+	1	0	0
chr10	131565884	131650825	chr10.131565884.131650825	+	0	0	0
chr10	131857318	131908690	chr10.131857318.131908690	-	0	0	0
chr10	133773338	133831912	chr10.133773338.133831912	+	0	0	0
chr10	135279194	135340013	chr10.135279194.135340013	+	0	0	0
chr10	14883605	14940200	chr10.14883605.14940200	-	0	0	0
chr10	1497052	1565940	chr10.1497052.1565940	+	0	0	0
chr10	27225801	27293044	chr10.27225801.27293044	-	0	0	0
chr10	45811056	45869430	chr10.45811056.45869430	-	0	0	0
chr10	45941567	45992839	chr10.45941567.45992839	+	0	0	0
chr10	6278028	6438042	chr10.6278028.6438042	+	0	0	0
chr10	6620998	6671464	chr10.6620998.6671464	+	0	0	0
chr10	6867638	7144890	chr10.6867638.7144890	-	1	0	0
chr10	88946836	89102096	chr10.88946836.89102096	-	0	0	0
chr10	89189912	89256691	chr10.89189912.89256691	+	0	0	0
chr10	89887845	90210130	chr10.89887845.90210130	+	0	0	0
chr10	92222951	92360015	chr10.92222951.92360015	+	1	0	0
chr10	92699062	92770166	chr10.92699062.92770166	+	1	0	0
chr10	94386918	94449856	chr10.94386918.94449856	-	0	0	0
chr10	97626513	97685148	chr10.97626513.97685148	-	0	0	0
chr10	97696134	97849961	chr10.97696134.97849961	-	0	0	0
chr10	98098321	98151146	chr10.98098321.98151146	+	0	0	0
chr10	98497256	98591710	chr10.98497256.98591710	+	0	0	0
chr1	101447311	101552802	chr1.101447311.101552802	+	0	0	0
chr1	105488528	105569511	chr1.105488528.105569511	-	1	0	0
chr1	107814249	108093155	chr1.107814249.108093155	-	0	0	0
chr11	10558577	10672681	chr11.10558577.10672681	+	0	0	0
chr1	110889303	110954157	chr1.110889303.110954157	+	0	0	0
chr11	110199164	110250407	chr11.110199164.110250407	+	1	0	0
chr11	118682874	118741917	chr11.118682874.118741917	+	1	0	0
chr11	122524697	122598048	chr11.122524697.122598048	-	0	0	0
chr11	123680932	123882162	chr11.123680932.123882162	+	0	0	0
chr11	12922704	13030579	chr11.12922704.13030579	-	0	0	0
chr1	113499068	113598068	chr1.113499068.113598068	+	0	0	0
chr1	116044132	116103524	chr1.116044132.116103524	-	1	0	0
chr1	119683091	119803567	chr1.119683091.119803567	+	0	0	0
chr11	23354211	23424121	chr11.23354211.23424121	+	1	0	0
chr11	23572643	23630600	chr11.23572643.23630600	+	1	0	0
chr11	23675906	23831859	chr11.23675906.23831859	+	1	0	0
chr11	2662219	2720411	chr11.2662219.2720411	-	0	0	0
chr11	27528561	27646139	chr11.27528561.27646139	+	0	0	0
chr11	33183219	33258983	chr11.33183219.33258983	+	0	0	0
chr1	143177692	143254560	chr1.143177692.143254560	+	1	0	0
chr1	146644427	146699219	chr1.146644427.146699219	+	0	0	0
chr11	47575264	47638857	chr11.47575264.47638857	-	0	0	0
chr1	149216120	149278534	chr1.149216120.149278534	+	0	0	0
chr1	150516850	150594598	chr1.150516850.150594598	-	0	0	0
chr11	5527309	5684054	chr11.5527309.5684054	-	0	0	0
chr11	58711063	58781786	chr11.58711063.58781786	-	0	0	0
chr1	160416980	160518921	chr1.160416980.160518921	+	0	0	0
chr1	160616884	160667191	chr1.160616884.160667191	+	0	0	0
chr11	65181431	65233760	chr11.65181431.65233760	+	0	0	0
chr1	16774895	16825278	chr1.16774895.16825278	-	0	0	0
chr11	69830952	69924302	chr11.69830952.69924302	+	0	0	0
chr1	172339396	172394395	chr1.172339396.172394395	-	0	0	0
chr1	173299135	173446192	chr1.173299135.173446192	-	0	0	0
chr11	7442443	7534815	chr11.7442443.7534815	-	0	0	0
chr11	7650478	7710668	chr11.7650478.7710668	-	0	0	0
chr11	77531880	77589765	chr11.77531880.77589765	-	0	0	0
chr1	178304784	178455949	chr1.178304784.178455949	-	0	0	0
chr1	180891843	180941849	chr1.180891843.180941849	-	0	0	0
chr11	82997368	83075892	chr11.82997368.83075892	+	0	0	0
chr11	86134221	86206385	chr11.86134221.86206385	+	0	0	0
chr11	86385013	86449524	chr11.86385013.86449524	+	0	0	0
chr11	8944934	8998667	chr11.8944934.8998667	+	0	0	0
chr11	93459844	93517621	chr11.93459844.93517621	-	0	0	0
chr1	194466888	194586267	chr1.194466888.194586267	-	1	0	0
chr1	194486989	194663365	chr1.194486989.194663365	+	1	0	0
chr1	194697762	194791270	chr1.194697762.194791270	+	1	0	0
chr1	194802386	195020897	chr1.194802386.195020897	+	1	0	0
chr11	9774573	9834566	chr11.9774573.9834566	+	0	0	0
chr1	198709285	199153464	chr1.198709285.199153464	-	0	0	0
chr1	198953290	199081379	chr1.198953290.199081379	+	1	0	0
chr1	204527248	204599208	chr1.204527248.204599208	+	0	0	0
chr1	205782629	205882082	chr1.205782629.205882082	+	0	0	0
chr1	207957114	208059882	chr1.207957114.208059882	-	0	0	0
chr1	208106419	208201063	chr1.208106419.208201063	+	0	0	0
chr12	103627326	103695718	chr12.103627326.103695718	-	0	0	0
chr12	10961380	11033559	chr12.10961380.11033559	-	0	0	0
chr12	117067665	117131218	chr12.117067665.117131218	-	1	0	0
chr12	117099357	117169081	chr12.117099357.117169081	+	0	0	0
chr12	117190268	117241589	chr12.117190268.117241589	-	0	0	0
chr12	119915068	119967818	chr12.119915068.119967818	-	0	0	0
chr12	122079946	122146593	chr12.122079946.122146593	+	0	0	0
chr12	122391495	122462273	chr12.122391495.122462273	-	0	0	0
chr1	212278348	212354644	chr1.212278348.212354644	+	0	0	0
chr12	123110947	123167292	chr12.123110947.123167292	+	0	0	0
chr1	222890658	222945733	chr1.222890658.222945733	-	0	0	0
chr12	23174572	23307942	chr12.23174572.23307942	+	1	0	0
chr12	25150521	25205180	chr12.25150521.25205180	+	0	0	0
chr12	27183606	27243145	chr12.27183606.27243145	+	0	0	0
chr12	2934237	2985353	chr12.2934237.2985353	+	0	0	0
chr12	29430464	29493578	chr12.29430464.29493578	-	0	0	0
chr1	238563997	238649326	chr1.238563997.238649326	-	1	0	0
chr12	4551139	4632496	chr12.4551139.4632496	+	0	0	0
chr1	247290484	247360622	chr1.247290484.247360622	+	0	0	0
chr12	47529332	47610233	chr12.47529332.47610233	-	0	0	0
chr12	51318153	51373565	chr12.51318153.51373565	-	0	0	0
chr12	70531159	70637922	chr12.70531159.70637922	-	0	0	0
chr12	8332982	8415649	chr12.8332982.8415649	+	0	0	0
chr12	93335773	93399995	chr12.93335773.93399995	+	0	0	0
chr12	93902185	93968572	chr12.93902185.93968572	-	0	0	0
chr12	93970521	94045802	chr12.93970521.94045802	+	0	0	0
chr12	9545640	9597703	chr12.9545640.9597703	-	0	0	0
chr12	96488396	96587813	chr12.96488396.96587813	+	0	0	0
chr12	96663613	96736986	chr12.96663613.96736986	+	0	0	0
chr12	9737198	9822303	chr12.9737198.9822303	+	0	0	0
chr12	9852151	9978049	chr12.9852151.9978049	+	0	0	0
chr13	105328550	105399602	chr13.105328550.105399602	-	1	0	0
chr13	105437429	105490272	chr13.105437429.105490272	-	1	0	0
chr1	31974167	32036754	chr1.31974167.32036754	+	0	0	0
chr13	19857345	19918750	chr13.19857345.19918750	-	1	0	0
chr13	22618431	22672876	chr13.22618431.22672876	+	1	0	0
chr13	29394579	29475856	chr13.29394579.29475856	+	1	0	0
chr13	30881767	30951310	chr13.30881767.30951310	-	0	0	0
chr13	32527847	32604708	chr13.32527847.32604708	+	0	0	0
chr13	41366563	41506054	chr13.41366563.41506054	-	0	0	0
chr13	41736446	41835836	chr13.41736446.41835836	+	0	0	0
chr13	44907889	45005443	chr13.44907889.45005443	-	0	0	0
chr13	45912856	45972962	chr13.45912856.45972962	+	0	0	0
chr13	50526558	50699530	chr13.50526558.50699530	-	0	0	0
chr13	51007557	51066820	chr13.51007557.51066820	+	1	0	0
chr13	51087032	51173027	chr13.51087032.51173027	+	1	0	0
chr13	85978988	86057157	chr13.85978988.86057157	-	1	0	0
chr13	89235048	89374894	chr13.89235048.89374894	-	1	0	0
chr13	89357586	89408964	chr13.89357586.89408964	+	1	0	0
chr13	89419474	89512629	chr13.89419474.89512629	-	1	0	0
chr13	89530122	89590541	chr13.89530122.89590541	-	1	0	0
chr14	106757655	106936259	chr14.106757655.106936259	-	1	0	0
chr14	20191756	20260758	chr14.20191756.20260758	+	0	0	0
chr1	42384496	42501485	chr1.42384496.42501485	-	0	0	0
chr14	24635774	24687374	chr14.24635774.24687374	+	0	0	0
chr14	40778500	40830099	chr14.40778500.40830099	+	1	0	0
chr14	50475162	50583833	chr14.50475162.50583833	-	0	0	0
chr14	50864001	50943929	chr14.50864001.50943929	+	0	0	0
chr14	52536981	52593288	chr14.52536981.52593288	-	0	0	0
chr14	58333514	58390051	chr14.58333514.58390051	-	0	0	0
chr14	62017698	62070725	chr14.62017698.62070725	+	0	0	0
chr14	67684777	67804580	chr14.67684777.67804580	-	0	0	0
chr14	78446533	78870073	chr14.78446533.78870073	+	0	0	0
chr14	96116833	96391851	chr14.96116833.96391851	+	0	0	0
chr14	98382594	98444373	chr14.98382594.98444373	-	1	0	0
chr15	100256693	100336139	chr15.100256693.100336139	+	0	0	0
chr15	25244225	25407612	chr15.25244225.25407612	+	0	0	0
chr1	53041664	53098309	chr1.53041664.53098309	-	0	0	0
chr15	30931023	31066280	chr15.30931023.31066280	+	0	0	0
chr15	31124989	31195815	chr15.31124989.31195815	+	0	0	0
chr15	44160617	44214644	chr15.44160617.44214644	+	0	0	0
chr15	50097637	50150339	chr15.50097637.50150339	-	0	0	0
chr15	52204331	52269663	chr15.52204331.52269663	+	0	0	0
chr15	55582212	55647420	chr15.55582212.55647420	-	0	0	0
chr15	60056196	60131261	chr15.60056196.60131261	-	1	0	0
chr15	60771454	60954372	chr15.60771454.60954372	+	0	0	0
chr15	67691680	67813933	chr15.67691680.67813933	-	0	0	0
chr15	75343067	75428990	chr15.75343067.75428990	+	0	0	0
chr15	81293254	81353539	chr15.81293254.81353539	+	0	0	0
chr15	85052287	85113944	chr15.85052287.85113944	-	0	0	0
chr15	89939063	90046972	chr15.89939063.90046972	+	0	0	0
chr15	93774997	94346294	chr15.93774997.94346294	+	0	0	0
chr15	98417663	98589970	chr15.98417663.98589970	-	0	0	0
chr16	10929416	10982516	chr16.10929416.10982516	-	0	0	0
chr16	11945543	12004909	chr16.11945543.12004909	+	0	0	0
chr1	61248783	61415110	chr1.61248783.61415110	-	1	0	0
chr16	22386434	22448425	chr16.22386434.22448425	-	0	0	0
chr16	29548548	29624034	chr16.29548548.29624034	-	0	0	0
chr16	30257122	30368347	chr16.30257122.30368347	-	0	0	0
chr16	3661772	3741110	chr16.3661772.3741110	+	0	0	0
chr16	65342352	65610150	chr16.65342352.65610150	-	1	0	0
chr16	70024214	70099695	chr16.70024214.70099695	-	0	0	0
chr16	72037445	72152070	chr16.72037445.72152070	-	0	0	0
chr16	724174	776773	chr16.724174.776773	+	0	0	0
chr16	72779315	72865306	chr16.72779315.72865306	+	0	0	0
chr16	75691341	75745278	chr16.75691341.75745278	+	0	0	0
chr16	77470649	77716715	chr16.77470649.77716715	-	0	0	0
chr17	12121973	12569169	chr17.12121973.12569169	+	0	0	0
chr17	29036697	29136528	chr17.29036697.29136528	+	0	0	0
chr17	38673256	38821289	chr17.38673256.38821289	+	0	0	0
chr17	41393275	41451006	chr17.41393275.41451006	+	1	0	0
chr17	42223846	42282332	chr17.42223846.42282332	-	0	0	0
chr17	43268089	43324814	chr17.43268089.43324814	-	0	0	0
chr17	43625261	43687639	chr17.43625261.43687639	-	0	0	0
chr17	45121588	45177570	chr17.45121588.45177570	-	0	0	0
chr17	45675359	45726623	chr17.45675359.45726623	-	0	0	0
chr17	56410938	56495261	chr17.56410938.56495261	+	0	0	0
chr17	67625146	67857788	chr17.67625146.67857788	+	0	0	0
chr17	6794391	6859947	chr17.6794391.6859947	+	1	0	0
chr17	75400092	75458054	chr17.75400092.75458054	-	0	0	0
chr1	77799945	77879178	chr1.77799945.77879178	-	0	0	0
chr17	8371495	8423050	chr17.8371495.8423050	+	0	0	0
chr18	14045939	14099932	chr18.14045939.14099932	-	0	0	0
chr18	24237532	24290430	chr18.24237532.24290430	-	0	0	0
chr18	36014529	36084473	chr18.36014529.36084473	-	1	0	0
chr18	36849521	37115579	chr18.36849521.37115579	-	1	0	0
chr18	37152248	37380233	chr18.37152248.37380233	-	1	0	0
chr18	37826045	37932748	chr18.37826045.37932748	+	1	0	0
chr18	46550087	46622686	chr18.46550087.46622686	+	0	0	0
chr1	84960571	85018803	chr1.84960571.85018803	-	0	0	0
chr18	53534803	53644421	chr18.53534803.53644421	-	1	0	0
chr18	54240685	54297681	chr18.54240685.54297681	+	0	0	0
chr18	55336508	55487518	chr18.55336508.55487518	+	0	0	0
chr18	62539739	62658511	chr18.62539739.62658511	-	1	0	0
chr1	86642712	86697833	chr1.86642712.86697833	-	1	0	0
chr18	70967386	71056506	chr18.70967386.71056506	-	1	0	0
chr18	71142684	71322608	chr18.71142684.71322608	-	1	0	0
chr18	71336816	71529060	chr18.71336816.71529060	-	1	0	0
chr18	71468386	71524766	chr18.71468386.71524766	+	1	0	0
chr18	71959416	72102962	chr18.71959416.72102962	-	0	0	0
chr1	90030019	90098410	chr1.90030019.90098410	-	0	0	0
chr19	12091269	12161393	chr19.12091269.12161393	+	0	0	0
chr19	12300064	12357541	chr19.12300064.12357541	+	0	0	0
chr1	91325225	91380856	chr1.91325225.91380856	-	0	0	0
chr19	14370576	14499748	chr19.14370576.14499748	-	0	0	0
chr19	20272834	20349237	chr19.20272834.20349237	-	0	0	0
chr19	20959127	21044122	chr19.20959127.21044122	+	1	0	0
chr19	21708884	21769943	chr19.21708884.21769943	-	0	0	0
chr19	28284377	28380495	chr19.28284377.28380495	+	1	0	0
chr19	28780538	28893538	chr19.28780538.28893538	-	1	0	0
chr19	35093484	35168357	chr19.35093484.35168357	-	0	0	0
chr19	35264205	35351113	chr19.35264205.35351113	-	0	0	0
chr1	94020218	94097695	chr1.94020218.94097695	+	0	0	0
chr19	42901468	43048490	chr19.42901468.43048490	+	0	0	0
chr19	55517581	55573612	chr19.55517581.55573612	+	0	0	0
chr19	58858692	58917700	chr19.58858692.58917700	+	0	0	0
chr20	1306103	1363486	chr20.1306103.1363486	+	0	0	0
chr20	13277820	13370035	chr20.13277820.13370035	-	0	0	0
chr20	25604733	25688968	chr20.25604733.25688968	+	0	0	0
chr20	32815677	32867962	chr20.32815677.32867962	-	0	0	0
chr20	35136144	35201518	chr20.35136144.35201518	-	0	0	0
chr20	39363795	39519976	chr20.39363795.39519976	-	1	0	0
chr20	46523528	46581690	chr20.46523528.46581690	+	1	0	0
chr20	49726056	49778157	chr20.49726056.49778157	-	1	0	0
chr20	58422766	58481502	chr20.58422766.58481502	+	0	0	0
chr20	58729462	59068359	chr20.58729462.59068359	+	1	0	0
chr20	61639080	61695063	chr20.61639080.61695063	+	0	0	0
chr21	15215912	15313258	chr21.15215912.15313258	-	1	0	0
chr21	15399769	15538371	chr21.15399769.15538371	+	0	0	0
chr21	16881061	16976259	chr21.16881061.16976259	+	1	0	0
chr21	17603381	17828770	chr21.17603381.17828770	+	1	0	0
chr21	17859831	17969432	chr21.17859831.17969432	+	1	0	0
chr21	19775970	19834490	chr21.19775970.19834490	-	0	0	0
chr21	19827033	19901713	chr21.19827033.19901713	+	1	0	0
chr2	122701938	122841104	chr2.122701938.122841104	+	1	0	0
chr21	24106617	24333463	chr21.24106617.24333463	-	1	0	0
chr2	124424248	124672927	chr2.124424248.124672927	-	1	0	0
chr21	25095221	25340926	chr21.25095221.25340926	-	1	0	0
chr21	33507524	33590044	chr21.33507524.33590044	-	1	0	0
chr21	35303801	35415816	chr21.35303801.35415816	+	1	0	0
chr21	35515513	35570158	chr21.35515513.35570158	+	0	0	0
chr2	136873650	137337039	chr2.136873650.137337039	+	0	0	0
chr2	137376490	137464145	chr2.137376490.137464145	+	1	0	0
chr21	39114361	39178250	chr21.39114361.39178250	+	0	0	0
chr21	40078560	40145487	chr21.40078560.40145487	-	1	0	0
chr2	1435391	1525517	chr2.1435391.1525517	-	0	0	0
chr2	145423097	145780738	chr2.145423097.145780738	+	0	0	0
chr21	45565605	45629944	chr21.45565605.45629944	+	0	0	0
chr2	152333860	152411506	chr2.152333860.152411506	+	0	0	0
chr2	1542046	1635658	chr2.1542046.1635658	-	0	0	0
chr2	156971454	157080532	chr2.156971454.157080532	-	1	0	0
chr2	16557450	16659709	chr2.16557450.16659709	-	1	0	0
chr2	179369782	179511107	chr2.179369782.179511107	+	0	0	0
chr2	181988667	182321185	chr2.181988667.182321185	+	0	0	0
chr2	195533347	195927540	chr2.195533347.195927540	-	1	0	0
chr2	195945707	196083578	chr2.195945707.196083578	-	1	0	0
chr2	201560247	201669359	chr2.201560247.201669359	+	0	0	0
chr2	201828403	201882431	chr2.201828403.201882431	+	0	0	0
chr2	210886984	210942459	chr2.210886984.210942459	+	0	0	0
chr2	215223497	215302021	chr2.215223497.215302021	-	0	0	0
chr2	215349019	215413493	chr2.215349019.215413493	-	0	0	0
chr22	17082825	17180368	chr22.17082825.17180368	+	0	0	0
chr2	218145476	218664441	chr2.218145476.218664441	-	0	0	0
chr22	22597117	22650328	chr22.22597117.22650328	-	0	0	0
chr22	23208562	23278943	chr22.23208562.23278943	+	0	0	0
chr22	23977178	24059486	chr22.23977178.24059486	-	0	0	0
chr22	25857645	25947220	chr22.25857645.25947220	+	0	0	0
chr22	26427007	26477985	chr22.26427007.26477985	+	0	0	0
chr22	28315476	28404250	chr22.28315476.28404250	+	0	0	0
chr22	30395067	30446578	chr22.30395067.30446578	-	0	0	0
chr2	231004801	231088894	chr2.231004801.231088894	+	0	0	0
chr22	31676066	31747110	chr22.31676066.31747110	+	0	0	0
chr2	232525404	232597134	chr2.232525404.232597134	-	0	0	0
chr22	33615421	33669061	chr22.33615421.33669061	-	0	0	0
chr2	239562312	239664821	chr2.239562312.239664821	+	1	0	0
chr22	41810094	41864998	chr22.41810094.41864998	+	0	0	0
chr22	42480288	42543900	chr22.42480288.42543900	+	0	0	0
chr2	243031940	243087864	chr2.243031940.243087864	+	1	0	0
chr22	46959714	47016298	chr22.46959714.47016298	+	0	0	0
chr22	47571594	47626763	chr22.47571594.47626763	+	0	0	0
chr22	49806501	50013289	chr22.49806501.50013289	-	0	0	0
chr2	28002608	28057038	chr2.28002608.28057038	+	0	0	0
chr2	2822326	2907249	chr2.2822326.2907249	-	1	0	0
chr2	2918843	3192725	chr2.2918843.3192725	-	0	0	0
chr2	36726060	36779403	chr2.36726060.36779403	-	0	0	0
chr2	39664613	39770294	chr2.39664613.39770294	+	0	0	0
chr2	40077988	40496150	chr2.40077988.40496150	+	0	0	0
chr2	43176719	43231068	chr2.43176719.43231068	+	1	0	0
chr2	4331589	4642746	chr2.4331589.4642746	+	1	0	0
chr2	47913159	48009861	chr2.47913159.48009861	+	0	0	0
chr2	49324585	49400976	chr2.49324585.49400976	+	0	0	0
chr2	58883827	58976735	chr2.58883827.58976735	+	1	0	0
chr2	59075394	59150141	chr2.59075394.59150141	+	0	0	0
chr2	59423790	60354175	chr2.59423790.60354175	-	1	0	0
chr2	60327396	60397653	chr2.60327396.60397653	+	1	0	0
chr2	62217272	62373984	chr2.62217272.62373984	-	0	0	0
chr2	62363205	62415595	chr2.62363205.62415595	+	0	0	0
chr2	68480089	68536442	chr2.68480089.68536442	+	0	0	0
chr2	6851982	6980683	chr2.6851982.6980683	-	0	0	0
chr2	76535191	76771418	chr2.76535191.76771418	+	1	0	0
chr2	76816870	76870128	chr2.76816870.76870128	+	1	0	0
chr2	8328042	8442443	chr2.8328042.8442443	-	1	0	0
chr2	95873380	95929112	chr2.95873380.95929112	+	1	0	0
chr2	96874305	96925620	chr2.96874305.96925620	+	0	0	0
chr2	99816074	99919160	chr2.99816074.99919160	+	0	0	0
chr3	116839819	117071931	chr3.116839819.117071931	-	1	0	0
chr3	123304327	123384775	chr3.123304327.123384775	+	0	0	0
chr3	126884322	126937386	chr3.126884322.126937386	-	0	0	0
chr3	126940460	126997118	chr3.126940460.126997118	+	1	0	0
chr3	129665192	129717568	chr3.129665192.129717568	-	0	0	0
chr3	148508161	148558247	chr3.148508161.148558247	-	0	0	0
chr3	157088869	157141421	chr3.157088869.157141421	+	0	0	0
chr3	159516909	159579280	chr3.159516909.159579280	-	0	0	0
chr3	161376735	162120496	chr3.161376735.162120496	+	1	0	0
chr3	162134085	162358461	chr3.162134085.162358461	-	1	0	0
chr3	174159825	174235593	chr3.174159825.174235593	+	1	0	0
chr3	180408754	180472007	chr3.180408754.180472007	-	1	0	0
chr3	18310410	18401434	chr3.18310410.18401434	+	0	0	0
chr3	195640463	195716055	chr3.195640463.195716055	-	0	0	0
chr3	197067728	197147930	chr3.197067728.197147930	-	1	0	0
chr3	197302785	197379780	chr3.197302785.197379780	-	0	0	0
chr3	21798400	21853594	chr3.21798400.21853594	-	0	0	0
chr3	21867013	22210527	chr3.21867013.22210527	-	1	0	0
chr3	22272216	22413978	chr3.22272216.22413978	-	1	0	0
chr3	25705224	25799240	chr3.25705224.25799240	+	0	0	0
chr3	25894093	26664296	chr3.25894093.26664296	+	0	0	0
chr3	26085240	26162798	chr3.26085240.26162798	-	1	0	0
chr3	32250652	32317641	chr3.32250652.32317641	-	0	0	0
chr3	32497020	32580777	chr3.32497020.32580777	+	0	0	0
chr3	3889132	3975834	chr3.3889132.3975834	-	0	0	0
chr3	3988278	4110425	chr3.3988278.4110425	-	1	0	0
chr3	40222101	40350859	chr3.40222101.40350859	-	0	0	0
chr3	4121811	4402828	chr3.4121811.4402828	-	0	0	0
chr3	45568133	45637894	chr3.45568133.45637894	-	0	0	0
chr3	47205961	47270723	chr3.47205961.47270723	+	0	0	0
chr3	5261650	5319902	chr3.5261650.5319902	+	0	0	0
chr3	57547768	57640482	chr3.57547768.57640482	+	0	0	0
chr3	578824	911241	chr3.578824.911241	+	1	0	0
chr3	6549664	6786443	chr3.6549664.6786443	+	1	0	0
chr3	72238254	72361609	chr3.72238254.72361609	-	1	0	0
chr4	100010078	100063323	chr4.100010078.100063323	+	0	0	0
chr4	101032865	101087779	chr4.101032865.101087779	-	1	0	0
chr4	1109116	1161860	chr4.1109116.1161860	+	0	0	0
chr4	112278370	112718556	chr4.112278370.112718556	-	1	0	0
chr4	112744371	113033315	chr4.112744371.113033315	-	1	0	0
chr4	118597317	118749435	chr4.118597317.118749435	-	1	0	0
chr4	118782986	119102455	chr4.118782986.119102455	-	0	0	0
chr4	120376199	120502798	chr4.120376199.120502798	+	0	0	0
chr4	129369782	129440381	chr4.129369782.129440381	+	1	0	0
chr4	132348671	132432756	chr4.132348671.132432756	+	1	0	0
chr4	132445435	132547475	chr4.132445435.132547475	+	1	0	0
chr4	133184063	133336191	chr4.133184063.133336191	+	1	0	0
chr4	134014231	134070192	chr4.134014231.134070192	-	0	0	0
chr4	139810652	139978870	chr4.139810652.139978870	-	0	0	0
chr4	140296502	140374908	chr4.140296502.140374908	-	0	0	0
chr4	140311935	140374785	chr4.140311935.140374785	+	0	0	0
chr4	144051476	144105788	chr4.144051476.144105788	-	0	0	0
chr4	145101620	145271750	chr4.145101620.145271750	+	1	0	0
chr4	149523419	149616553	chr4.149523419.149616553	+	1	0	0
chr4	149903607	150226153	chr4.149903607.150226153	+	1	0	0
chr4	152900854	152994276	chr4.152900854.152994276	-	1	0	0
chr4	16259810	16400927	chr4.16259810.16400927	+	0	0	0
chr4	16413549	16556316	chr4.16413549.16556316	+	0	0	0
chr4	169770070	169908741	chr4.169770070.169908741	-	0	0	0
chr4	172447489	172568725	chr4.172447489.172568725	+	1	0	0
chr4	173950788	174090569	chr4.173950788.174090569	-	0	0	0
chr4	178363408	178586882	chr4.178363408.178586882	+	0	0	0
chr4	185233240	185308875	chr4.185233240.185308875	-	0	0	0
chr4	188197949	188424564	chr4.188197949.188424564	-	1	0	0
chr4	37526876	37592421	chr4.37526876.37592421	-	0	0	0
chr4	38596164	38666456	chr4.38596164.38666456	-	0	0	0
chr4	4544019	4763354	chr4.4544019.4763354	+	0	0	0
chr4	68280225	68337988	chr4.68280225.68337988	-	0	0	0
chr4	68588222	68763961	chr4.68588222.68763961	+	0	0	0
chr4	75143797	75196013	chr4.75143797.75196013	-	0	0	0
chr4	77861077	77969176	chr4.77861077.77969176	-	0	0	0
chr4	9626243	9691987	chr4.9626243.9691987	+	1	0	0
chr5	111004195	111064999	chr5.111004195.111064999	-	0	0	0
chr5	127257602	127418707	chr5.127257602.127418707	-	0	0	0
chr5	131645126	131762846	chr5.131645126.131762846	-	0	0	0
chr5	131822562	131891194	chr5.131822562.131891194	+	0	0	0
chr5	138705409	138764328	chr5.138705409.138764328	+	0	0	0
chr5	139102103	139159346	chr5.139102103.139159346	+	1	0	0
chr5	140566254	140635271	chr5.140566254.140635271	+	0	0	0
chr5	142985117	143272189	chr5.142985117.143272189	+	0	0	0
chr5	147704027	147756281	chr5.147704027.147756281	-	0	0	0
chr5	149670968	149781199	chr5.149670968.149781199	-	0	0	0
chr5	150228427	150290176	chr5.150228427.150290176	+	0	0	0
chr5	153762618	153823828	chr5.153762618.153823828	-	0	0	0
chr5	157402729	157459348	chr5.157402729.157459348	+	1	0	0
chr5	157602434	158002262	chr5.157602434.158002262	+	1	0	0
chr5	1579724	1633936	chr5.1579724.1633936	-	0	0	0
chr5	158024627	158079245	chr5.158024627.158079245	+	1	0	0
chr5	15836800	15901956	chr5.15836800.15901956	-	0	0	0
chr5	163721114	164759450	chr5.163721114.164759450	+	1	0	0
chr5	164771027	165110929	chr5.164771027.165110929	+	1	0	0
chr5	165198991	165390573	chr5.165198991.165390573	+	1	0	0
chr5	172825689	172962394	chr5.172825689.172962394	+	1	0	0
chr5	180662808	180717632	chr5.180662808.180717632	+	0	0	0
chr5	20698919	20795816	chr5.20698919.20795816	+	1	0	0
chr5	23980443	24046056	chr5.23980443.24046056	+	1	0	0
chr5	28524468	28576814	chr5.28524468.28576814	+	1	0	0
chr5	40457417	40539640	chr5.40457417.40539640	-	1	0	0
chr5	40552222	40605804	chr5.40552222.40605804	-	1	0	0
chr5	43018392	43120258	chr5.43018392.43120258	+	0	0	0
chr5	49774324	49826081	chr5.49774324.49826081	-	1	0	0
chr5	54721409	54781940	chr5.54721409.54781940	+	0	0	0
chr5	6136045	6295399	chr5.6136045.6295399	-	1	0	0
chr5	70429547	70503960	chr5.70429547.70503960	-	1	0	0
chr5	76382604	76460132	chr5.76382604.76460132	+	0	0	0
chr5	79330198	79407027	chr5.79330198.79407027	-	0	0	0
chr5	80525226	80597327	chr5.80525226.80597327	-	0	0	0
chr5	86594712	86689233	chr5.86594712.86689233	-	0	0	0
chr5	90676328	90751369	chr5.90676328.90751369	+	0	0	0
chr5	94747204	94799598	chr5.94747204.94799598	-	0	0	0
chr5	95090586	95158696	chr5.95090586.95158696	-	0	0	0
chr5	96149848	96202572	chr5.96149848.96202572	-	0	0	0
chr5	98263160	98318093	chr5.98263160.98318093	+	0	0	0
chr6	106173244	106272958	chr6.106173244.106272958	-	1	0	0
chr6	10761544	10866712	chr6.10761544.10866712	+	0	0	0
chr6	110796730	110863820	chr6.110796730.110863820	+	0	0	0
chr6	127664614	127854807	chr6.127664614.127854807	+	0	0	0
chr6	135399683	135502452	chr6.135399683.135502452	+	0	0	0
chr6	138014227	138109448	chr6.138014227.138109448	+	1	0	0
chr6	138126890	138189359	chr6.138126890.138189359	-	0	0	0
chr6	146101147	146207732	chr6.146101147.146207732	+	0	0	0
chr6	146140708	146205940	chr6.146140708.146205940	-	0	0	0
chr6	21665240	22232132	chr6.21665240.22232132	+	0	0	0
chr6	25987557	26046649	chr6.25987557.26046649	+	0	0	0
chr6	26155505	26251614	chr6.26155505.26251614	-	0	0	0
chr6	26798844	26894552	chr6.26798844.26894552	-	1	0	0
chr6	2821671	2887499	chr6.2821671.2887499	-	0	0	0
chr6	29909942	30003179	chr6.29909942.30003179	-	0	0	0
chr6	30227047	30294559	chr6.30227047.30294559	-	0	0	0
chr6	32888761	32941594	chr6.32888761.32941594	-	0	0	0
chr6	33217496	33270774	chr6.33217496.33270774	+	0	0	0
chr6	35157724	35227170	chr6.35157724.35227170	-	0	0	0
chr6	40608651	40678274	chr6.40608651.40678274	-	1	0	0
chr6	6477107	6539995	chr6.6477107.6539995	-	1	0	0
chr6	7052546	7106876	chr6.7052546.7106876	+	0	0	0
chr6	77219446	77303849	chr6.77219446.77303849	-	1	0	0
chr6	8436024	8594046	chr6.8436024.8594046	+	0	0	0
chr6	8606645	8734932	chr6.8606645.8734932	+	0	0	0
chr6	89794879	89855593	chr6.89794879.89855593	+	0	0	0
chr6	90348319	90406689	chr6.90348319.90406689	+	0	0	0
chr6	90996184	91109352	chr6.90996184.91109352	+	0	0	0
chr6	92935037	93432790	chr6.92935037.93432790	-	1	0	0
chr6	93434452	93582711	chr6.93434452.93582711	+	1	0	0
chr6	94126786	94243237	chr6.94126786.94243237	+	0	0	0
chr6	94274620	94419733	chr6.94274620.94419733	+	1	0	0
chr7	104581402	104654529	chr7.104581402.104654529	+	0	0	0
chr7	104597256	104654491	chr7.104597256.104654491	-	0	0	0
chr7	106549423	106606248	chr7.106549423.106606248	+	0	0	0
chr7	120722088	120884459	chr7.120722088.120884459	-	0	0	0
chr7	120898631	120988879	chr7.120898631.120988879	-	0	0	0
chr7	127622160	127672237	chr7.127622160.127672237	-	0	0	0
chr7	130536349	130794527	chr7.130536349.130794527	-	0	0	0
chr7	142376016	142437103	chr7.142376016.142437103	-	0	0	0
chr7	149219501	149321251	chr7.149219501.149321251	-	1	0	0
chr7	155115525	155174245	chr7.155115525.155174245	-	1	0	0
chr7	156421990	156473331	chr7.156421990.156473331	-	0	0	0
chr7	19707794	19915866	chr7.19707794.19915866	+	0	0	0
chr7	19949097	20008225	chr7.19949097.20008225	+	1	0	0
chr7	21877870	21940516	chr7.21877870.21940516	-	0	0	0
chr7	27166639	27228321	chr7.27166639.27228321	-	0	0	0
chr7	29675122	29725138	chr7.29675122.29725138	-	1	0	0
chr7	30549632	30634363	chr7.30549632.30634363	-	0	0	0
chr7	32603154	32768295	chr7.32603154.32768295	-	0	0	0
chr7	37723389	37826979	chr7.37723389.37826979	+	0	0	0
chr7	37993619	38081661	chr7.37993619.38081661	+	0	0	0
chr7	38370753	38451128	chr7.38370753.38451128	+	0	0	0
chr7	39773164	39839375	chr7.39773164.39839375	+	1	0	0
chr7	40111132	40172341	chr7.40111132.40172341	-	0	0	0
chr7	50233547	50307966	chr7.50233547.50307966	-	1	0	0
chr7	50472798	50555232	chr7.50472798.50555232	+	0	0	0
chr7	64498825	64576421	chr7.64498825.64576421	+	1	0	0
chr7	66658098	66769395	chr7.66658098.66769395	-	0	0	0
chr7	66767651	66826321	chr7.66767651.66826321	+	1	0	0
chr7	76692542	76751618	chr7.76692542.76751618	-	0	0	0
chr7	82579745	82638074	chr7.82579745.82638074	+	0	0	0
chr7	91439592	91502020	chr7.91439592.91502020	-	0	0	0
chr7	92261311	92337579	chr7.92261311.92337579	+	0	0	0
chr7	96251178	96302236	chr7.96251178.96302236	-	0	0	0
chr7	97502653	97601535	chr7.97502653.97601535	-	0	0	0
chr7	98610871	98672727	chr7.98610871.98672727	+	0	0	0
chr7	99870103	99943657	chr7.99870103.99943657	-	0	0	0
chr8	104241444	104310753	chr8.104241444.104310753	-	0	0	0
chr8	104324688	104410865	chr8.104324688.104410865	-	0	0	0
chr8	1088191	1340655	chr8.1088191.1340655	+	0	0	0
chr8	114656473	114877930	chr8.114656473.114877930	-	1	0	0
chr8	118112816	118184901	chr8.118112816.118184901	-	0	0	0
chr8	118244547	118453438	chr8.118244547.118453438	-	1	0	0
chr8	128806860	129126312	chr8.128806860.129126312	+	0	0	0
chr8	129664325	130692403	chr8.129664325.130692403	-	1	0	0
chr8	130159394	130222377	chr8.130159394.130222377	+	1	0	0
chr8	1356493	1447692	chr8.1356493.1447692	+	0	0	0
chr8	15269074	15396833	chr8.15269074.15396833	+	0	0	0
chr8	16940525	16995910	chr8.16940525.16995910	-	0	0	0
chr8	18871550	18942375	chr8.18871550.18942375	-	0	0	0
chr8	22355526	22411531	chr8.22355526.22411531	-	0	0	0
chr8	2374976	2462022	chr8.2374976.2462022	-	1	0	0
chr8	30385941	30436030	chr8.30385941.30436030	-	0	0	0
chr8	39972258	40035556	chr8.39972258.40035556	+	0	0	0
chr8	60173818	60475391	chr8.60173818.60475391	+	1	0	0
chr8	63105268	63162190	chr8.63105268.63162190	-	0	0	0
chr8	86196786	86271833	chr8.86196786.86271833	+	0	0	0
chr9	102532205	102583684	chr9.102532205.102583684	-	0	0	0
chr9	103064457	103133045	chr9.103064457.103133045	+	0	0	0
chr9	107444407	107516161	chr9.107444407.107516161	-	0	0	0
chr9	108861674	108927079	chr9.108861674.108927079	+	1	0	0
chr9	108959466	109096833	chr9.108959466.109096833	+	1	0	0
chr9	111151279	111259958	chr9.111151279.111259958	-	1	0	0
chr9	127420710	127479513	chr9.127420710.127479513	+	0	0	0
chr9	129221792	129296326	chr9.129221792.129296326	-	0	0	0
chr9	137365305	137525576	chr9.137365305.137525576	+	0	0	0
chr9	15461627	15512086	chr9.15461627.15512086	+	0	0	0
chr9	22029593	22141239	chr9.22029593.22141239	+	0	0	0
chr9	2423688	2506532	chr9.2423688.2506532	-	1	0	0
chr9	35737005	35790419	chr9.35737005.35790419	+	0	0	0
chr9	36212059	36304611	chr9.36212059.36304611	+	0	0	0
chr9	37358145	37417015	chr9.37358145.37417015	+	0	0	0
chr9	37789774	37887558	chr9.37789774.37887558	-	0	0	0
chr9	697374	749729	chr9.697374.749729	-	0	0	0
chr9	73109559	73168102	chr9.73109559.73168102	+	0	0	0
chr9	74384287	74477367	chr9.74384287.74477367	-	0	0	0
chr9	79220766	79280241	chr9.79220766.79280241	+	0	0	0
chr9	88420915	88530460	chr9.88420915.88530460	+	1	0	0
chr9	89274681	89339505	chr9.89274681.89339505	+	1	0	0
chr9	98562025	98638212	chr9.98562025.98638212	-	0	0	0
chrX	100201957	100264333	chrX.100201957.100264333	-	0	0	0
chrX	100673325	100742665	chrX.100673325.100742665	+	0	0	0
chrX	102009769	102219288	chrX.102009769.102219288	+	0	0	0
chrX	103173832	103229374	chrX.103173832.103229374	+	0	0	0
chrX	109421019	109513916	chrX.109421019.109513916	+	0	0	0
chrX	119329450	119383845	chrX.119329450.119383845	-	0	0	0
chrX	130822433	130964646	chrX.130822433.130964646	-	1	0	0
chrX	131352344	131573141	chrX.131352344.131573141	+	0	0	0
chrX	135991617	136103838	chrX.135991617.136103838	+	0	0	0
chrX	138289606	138567293	chrX.138289606.138567293	-	0	0	0
chrX	139904701	140081349	chrX.139904701.140081349	+	0	0	0
chrX	149108907	149207575	chrX.149108907.149207575	+	0	0	0
chrX	154616989	154683657	chrX.154616989.154683657	-	0	0	0
chrX	24096927	24157225	chrX.24096927.24157225	+	0	0	0
chrX	30513081	30576922	chrX.30513081.30576922	-	0	0	0
chrX	33357726	33744990	chrX.33357726.33744990	-	0	0	0
chrX	33744507	34380370	chrX.33744507.34380370	+	0	0	0
chrX	50993413	51046593	chrX.50993413.51046593	-	1	0	0
chrX	53123397	53200401	chrX.53123397.53200401	+	0	0	0
chrX	56807407	56861326	chrX.56807407.56861326	+	1	0	0
chrX	63339537	63404996	chrX.63339537.63404996	-	0	0	0
chrX	63954113	64070430	chrX.63954113.64070430	-	1	0	0
chrX	64062726	64125057	chrX.64062726.64125057	+	1	0	0
chrX	6558554	6623552	chrX.6558554.6623552	-	1	0	0
chrX	70521018	70577916	chrX.70521018.70577916	+	0	0	0
chrX	73164176	73253441	chrX.73164176.73253441	+	1	0	0
chrX	73217927	73513385	chrX.73217927.73513385	-	1	0	0
chrX	74524732	74609209	chrX.74524732.74609209	+	0	0	0
chrY	21032229	21152525	chrY.21032229.21152525	-	0	0	0
chrY	21729251	21780662	chrY.21729251.21780662	+	1	0	0
chrY	2649920	2709526	chrY.2649920.2709526	+	0	0	0
chrY	7142057	7273400	chrY.7142057.7273400	+	1	0	0
